# Supplementary material for: Fracture fabrication of a multi-scale channel device that efficiently captures and linearizes DNA from dilute solutions
Source: Royal Society of Chemistry journal article supplement (doi:10.1039/c4lc01294a), 2015-01-01
Supplement: c4lc01294a1.pdf [file c4lc01294a1.pdf]

## **Fracture Fabrication of a Multi-scale, Channel Device that Efficiently Captures and Linearizes DNA from Dilute Solutions**

Byoung Choul Kim<sup>1,2,3</sup>, Priyan Weerappuli<sup>1,3</sup>, M.D. Thouless<sup>4,5</sup>, and Shuichi Takayama<sup>1,2,3,6</sup>

<sup>1</sup>*Department of Biomedical Engineering, College of Engineering, University of Michigan, 2200 Bonisteel Blvd, Ann Arbor, MI 48109, USA*

<sup>2</sup>*Macromolecular Science and Engineering Center, College of Engineering, University of Michigan, 2300 Hayward St., Ann Arbor, MI 48109, USA*

<sup>3</sup>*Biointerfaces institute, University of Michigan, 2800 Plymouth Rd, Ann Arbor, MI 48109, USA*

<sup>4</sup>*Department of Mechanical Engineering, College of Engineering, University of Michigan, 2350 Hayward St., Ann Arbor, MI 48109, USA*

<sup>5</sup>*Department of Materials Science & Engineering, College of Engineering, University of Michigan, 2300 Hayward St., Ann Arbor, MI 48109, USA*

<sup>6</sup>*Division of Nano-Bio and Chemical Engineering WCU Project, UNIST, Ulsan, Republic of Korea*

Local DNA concentration in the closed ‘deep’ channel.

The applied strain was released when a single  $\lambda$ -DNA molecule was positioned inside the open ‘deep’ channel. The ‘deep’ channel volume in the absence of the applied strain ( $V_{closed}$ ) was approximately 0.366 fl, as calculated below:

$$V_{closed} = \text{channel cross-sectional area} \times \text{channel length} = 0.00122 \mu\text{m}^2 \times 300 \mu\text{m} \times 10^{-15} \text{ l}$$

The weight of the single  $\lambda$ -DNA molecule ( $wt_{\lambda-DNA}$ ) is:

$$wt_{\lambda-DNA} \cong \frac{\text{molecular weight of } \lambda-DNA}{\text{Avogadro's Number}} = \frac{3.2 \times 10^7}{6.022 \times 10^{23}} = 5.31 \times 10^{-17} \text{ g}$$

The local concentration of the single  $\lambda$ -DNA molecule in the closed ‘deep’ channel ( $C_{closed}$ ) could, thus, be calculated as follows:

$$C_{closed} = \frac{wt_{\lambda-DNA}}{V_{closed}} = \frac{5.31 \times 10^{-17} \text{ g}}{0.366 \times 10^{-15} \text{ l}} \cong 145 \text{ ng}/\mu\text{l}$$

Consequently, the final DNA concentration present within the closed ‘deep’ channel was approximately 145,000 times higher relative to the concentration of the initial DNA stock solution ( $C_{stock} \sim 1 \text{ pg}/\mu\text{l}$ ).

$$\frac{C_{closed}}{C_{stock}} = \frac{145 \text{ ng}/\mu\text{l}}{1 \text{ pg}/\mu\text{l}} = 145,000$$
